# Supplementary material for: Proper conditional analysis in the presence of missing data: Application to large scale meta-analysis of tobacco use phenotypes
Source: PLoS Genet. 2018 Jul 17;14(7):e1007452. doi: 10.1371/journal.pgen.1007452 (PMC6063450; doi:10.1371/journal.pgen.1007452)
Supplement: S4 Table — We analyzed independently associated variants from the meta-analysis conditional on the previously known GWAS signals (Panel A). We also performed the conditional analyses in the opposite direction, where we analyzed the previously reported GWAS variants conditional on the identified independently associated variants (Panel B). (XLSX) [file pgen.1007452.s007.xlsx]

## Sheet: Two Way Conditional Analysis
S4 Table. Two Way Conditional Analysis of Independently Associated Variants and Previously Reported GWAS Hits. We analyzed independently associated variants from the meta-analysis conditional on the previously known GWAS signals (Panel A). We also performed the conditional analyses in the opposite direction, where we analyzed the previously reported GWAS variants conditional on the identified ind…
Panel A. PCBS Identified Variants Conditional on Previously Reported GWAS Hits.
PCBS	RS	REF	ALT	AF	PVALUE	BETA	SD	N
1:154548521	rs2072659*	C	G	0.102	1.73e-08	-0.0384	0.00682	134862
7:32333642	rs215600*	G	A	0.641	0.00642	-0.0227	0.00832	134862
8:42579203	rs58379124	T	C	0.771	0.218	0.0225	0.0183	134862
9:136460224	rs56116178	A	G	0.105	0.0368	0.0281	0.0134	134862
15:78801394	rs11852372	A	C	0.339	0.00206	0.0485	0.0157	128249
15:78896129	rs1317286	A	G	0.338	0.0531	0.0401	0.0208	128249
15:78814389	rs7181245	C	T	0.213	0.0649	-0.0186	0.0101	128249
15:78911181	rs8040868	T	C	0.399	0.00149	0.0253	0.00797	128249
15:78739763	rs2089162	A	G	0.33	0.116	0.0123	0.00782	128249
19:41353107	rs56113850	T	C	0.575	2.32e-60	0.069	0.0042	128249
19:41371480	rs117824460	A	G	0.0286	1.44e-33	-0.151	0.0125	128249
19:41406448	rs117540499	G	A	0.023	9.41e-24	-0.133	0.0132	128249
19:41345395	rs7246742	T	G	0.131	1.67e-06	-0.028	0.00586	128249
	* Variants that did not attain genome-wide significance level (5E-8) in previous studies.
Panel B. Previously Reported GWAS Hits Conditional on PCBS Identified Variants .
PCBS	RS	REF	ALT	AF	PVALUE	BETA	SD	N
1:154257894	rs1760803	A	T	0.55	0.791	-0.00103	0.00389	134862
7:32347335	rs215614	G	A	0.628	0.6	-0.00432	0.00824	134862
8:42546711	rs1451240	A	G	0.776	0.428	0.0143	0.0181	134862
8:42550498	rs6474412	C	T	0.776	0.489	0.0127	0.0183	134862
9:136478355	rs3025343	G	A	0.119	0.426	0.0101	0.0127	134862
15:78851615	rs2036527	G	A	0.34	0.645	0.00828	0.018	128249
15:78863472	rs667282	T	C	0.22	0.00564	-0.0284	0.0103	128249
15:78894339	rs1051730	G	A	0.337	0.724	0.00766	0.0217	128249
15:78915872	rs55958997	C	A	0.365	0.362	-0.00881	0.00967	128249
19:41310571	rs3733829	A	G	0.36	0.61	-0.0022	0.00431	128249
19:41358624 (proxied by 19:41358663)	rs4105144	T	C	0.00028	0.93	-0.01	0.12	125384
